# Supplementary material for: Composition Effects on the Morphology of PVA/Chitosan Electrospun Nanofibers
Source: MDPI journal article supplement (doi:10.3390/polym14224856), 2022-11-11
Supplement: s1 [file s1]

# Composition Effects on the Morphology of PVA/Chitosan Electrospun Nanofibers

Gustavo C. Mata<sup>1, †</sup>, Maria Sirlene Morais<sup>2, †</sup>, Wanderley Pereira Oliveira<sup>2</sup>, Mônica Lopes Aguiar<sup>1, \*</sup>

**Table S1:** Parameters data of the nanofibers produced by electrospinning in this study.

| Sample   | PVA<br>(% w/w) | Chitosan<br>(% w/w) | Solvent | Production<br>Time (h) | Proportion<br>(PVA:CS) | Needle Inner<br>Diameter<br>(mm) | Temperature (°C)/<br>Relative Humidity<br>(%) |
|----------|----------------|---------------------|---------|------------------------|------------------------|----------------------------------|-----------------------------------------------|
| P1       | 7              | 4                   | Water   | -                      | 75:25                  | -                                | -                                             |
| P2       | 7              | 4                   | Water   | -                      | 50:50                  | -                                | -                                             |
| P3       | 7              | 4                   | Water   | -                      | 25:75                  | -                                | -                                             |
| P4       | 12             | 4                   | Water   | -                      | 75:25                  | -                                | -                                             |
| P5       | 12             | 4                   | Water   | -                      | 50:50                  | -                                | -                                             |
| P6       | 12             | 4                   | Water   | -                      | 25:75                  | -                                | -                                             |
| 0        | 7              | 4                   | AcOH    | 3                      | 75:25                  | 0.3                              | -                                             |
| 1        | 7              | 4                   | Water   | 2                      | 75:25                  | 0.6                              | -                                             |
| 2        | 7              | 4                   | AcOH    | 2                      | 75:25                  | 0.6                              | -                                             |
| 3        | 7              | 4                   | AcOH    | 2                      | 75:25                  | 0.6                              | -                                             |
| 4        | 7              | 4                   | Water   | 2                      | 75:25                  | 0.6                              | -                                             |
| 5        | 7              | 4                   | Water   | 2                      | 75:25                  | 0.6                              | -                                             |
| 6        | 12             | 4                   | Water   | 2                      | 75:25                  | 0.6                              | -                                             |
| 7        | 12             | 4                   | Water   | 2                      | 75:25                  | 0.6                              | -                                             |
| 8        | 7              | 4                   | AcOH    | 2                      | 75:25                  | 0.6                              | -                                             |
| 9        | 7              | 1                   | AcOH    | 2                      | 75:25                  | 0.6                              | -                                             |
| 10       | 12             | 1                   | Water   | 2                      | 75:25                  | 0.6                              | -                                             |
| 11       | 7              | 1                   | AcOH    | 2                      | 75:25                  | 0.6                              | -                                             |
| 12       | 7              | 1                   | AcOH    | 2                      | 75:25                  | 1.2                              | -                                             |
| 13       | 12             | 1                   | AcOH    | 3                      | 75:25                  | 0.6                              | -                                             |
| 14       | 7              | 2                   | AcOH    | 2                      | 75:25                  | 0.7                              | -                                             |
| A        | 7              | 4                   | Water   | 3                      | 75:25                  | 0.7                              | -                                             |
| B        | 12             | 1                   | Water   | 3                      | 75:25                  | 0.7                              | -                                             |
| 9.0 0.25 | 12             | 1                   | AcOH    | 3                      | 75:25                  | 0.55                             | -                                             |
| 9.0 0.50 | 12             | 2                   | AcOH    | 3                      | 75:25                  | 0.55                             | 26.3/34                                       |
| 9.0 0.75 | 12             | 3                   | AcOH    | 3                      | 75:25                  | 0.55                             | -                                             |
| 9.0 1.00 | 12             | 4                   | AcOH    | 3                      | 75:25                  | 0.55                             | -                                             |
| 7.5 0.25 | 10             | 1                   | AcOH    | 3                      | 75:25                  | 0.55                             | -                                             |
| 7.5 0.50 | 10             | 2                   | AcOH    | 3                      | 75:25                  | 0.55                             | -                                             |
| 7.5 0.75 | 10             | 3                   | AcOH    | 3                      | 75:25                  | 0.55                             | 25.0/39                                       |
| 7.5 1.00 | 10             | 4                   | AcOH    | 3                      | 75:25                  | 0.55                             | -                                             |
| 6.0 0.25 | 8              | 1                   | AcOH    | 3                      | 75:25                  | 0.55                             | 24.2/45                                       |
| 6.0 0.50 | 8              | 2                   | AcOH    | 3                      | 75:25                  | 0.55                             | 24.9/42                                       |
| 6.0 0.75 | 8              | 3                   | AcOH    | 3                      | 75:25                  | 0.55                             | 23.8/39                                       |
| 6.0 1.00 | 8              | 4                   | AcOH    | 3                      | 75:25                  | 0.55                             | 25.8/35                                       |
| 4.5 0.25 | 6              | 1                   | AcOH    | 3                      | 75:25                  | 0.55                             | 22.7/35                                       |

|          |    |   |      |   |       |      |         |
|----------|----|---|------|---|-------|------|---------|
| 4.5 0.50 | 6  | 2 | AcOH | 3 | 75:25 | 0.55 | 21.6/39 |
| 4.5 0.75 | 6  | 3 | AcOH | 3 | 75:25 | 0.55 | 22/38   |
| 4.5 1.00 | 6  | 4 | AcOH | 3 | 75:25 | 0.55 | 23.5/38 |
| PP6.2    | 6  | 2 | AcOH | 3 | 75:25 | 0.55 | 25.3/46 |
| PP8.2    | 8  | 2 | AcOH | 3 | 75:25 | 0.55 | 24.9/42 |
| PP8.4    | 8  | 4 | AcOH | 3 | 75:25 | 0.55 | -       |
| PP10.2   | 10 | 2 | AcOH | 3 | 75:25 | 0.55 | -       |
| PP12.1   | 12 | 1 | AcOH | 3 | 75:25 | 0.55 | -       |

**Table S2:** Data obtained by the rheological analysis of samples solutions described at the **Table 1**.

| Sample                | Consistency<br>index – K<br>(dyn.cm <sup>-2</sup> .s) | Flow index – n<br>(dimentionless) | Reduced Chi-<br>Sqr | R-Square<br>(COD) | Adj.<br>R-Square |
|-----------------------|-------------------------------------------------------|-----------------------------------|---------------------|-------------------|------------------|
| CS 0.25 ->            | 0.38 ± 0.07                                           | 0.63 ± 0.06                       | 2.02                | 0.99              | 0.98             |
| CS 0.25 <-            | 0.09 ± 0.02                                           | 1.01 ± 0.08                       | 3.06                | 0.98              | 0.98             |
| CS 0.50 ->            | 0.40 ± 0.05                                           | 0.70 ± 0.04                       | 0.50                | 0.99              | 0.99             |
| CS 0.50 <-            | 0.21 ± 0.02                                           | 0.88 ± 0.04                       | 29.31               | 0.98              | 0.98             |
| CS 0.75 ->            | 0.52 ± 0.03                                           | 0.74 ± 0.02                       | 1.40                | 0.99              | 0.99             |
| CS 0.75 <-            | 0.27 ± 0.05                                           | 0.91 ± 0.05                       | 9.22                | 0.99              | 0.99             |
| CS 1.00 ->            | 0.57 ± 0.03                                           | 0.83 ± 0.01                       | 0.02                | 1.00              | 1.00             |
| CS 1.00 <-            | 0.33 ± 0.03                                           | 0.97 ± 0.03                       | 0.06                | 0.99              | 0.99             |
| PVA 4.5 ->            | 2.18 ± 0.06                                           | 0.91 ± 0.01                       | 11.27               | 1.00              | 0.99             |
| PVA 4.5 <-            | 2.08 ± 0.14                                           | 0.94 ± 0.03                       | 49.54               | 0.99              | 0.99             |
| PVA 6.0 ->            | 5.36 ± 0.12                                           | 0.94 ± 0.02                       | 0.07                | 1.00              | 0.99             |
| PVA 6.0 <-            | 6.40 ± 1.76                                           | 0.84 ± 0.21                       | 41.99               | 0.70              | 0.67             |
| PVA 7.5 ->            | 16.27 ± 0.22                                          | 1.09 ± 0.03                       | 1.55                | 0.99              | 0.99             |
| PVA 7.5 <-            | 20.81 ± 0.35                                          | 0.82 ± 0.03                       | 27.79               | 0.99              | 0.99             |
| PVA 9.0 ->            | 72.52 ± 24.60                                         | 0.87 ± 0.21                       | 15.92               | 0.87              | 0.85             |
| PVA 9.0 <-            | 73.61 ± 43.27                                         | 0.87 ± 0.37                       | 55.29               | 0.40              | 0.31             |
| PVA 4.5 CS 0.25<br>-> | 1.016 ± 0.02                                          | 0.99 ± 0.01                       | 0.40                | 0.99              | 0.99             |
| PVA 4.5 CS 0.25<br><- | 1.02 ± 0.03                                           | 0.99 ± 0.01                       | 0.64                | 0.99              | 0.99             |
| PVA 4.5 CS 0.50<br>-> | 4.54 ± 0.15                                           | 0.99 ± 0.06                       | 92.07               | 0.99              | 0.98             |
| PVA 4.5 CS 0.50<br><- | 5.25 ± 0.80                                           | 0.70 ± 0.19                       | 998.56              | 0.88              | 0.86             |
| PVA 4.5 CS 0.75<br>-> | 6.55 ± 1.06                                           | 1.09 ± 0.28                       | 117.12              | 0.95              | 0.92             |
| PVA 4.5 CS 0.75<br><- | 8.51 ± 2.11                                           | 0.76 ± 0.77                       | 450.54              | 0.55              | 0.33             |
| PVA 4.5 CS 1.00<br>-> | 8.04 ± 1.08                                           | 0.92 ± 0.24                       | 118.51              | 0.94              | 0.90             |
| PVA 4.5 CS 1.00<br><- | 10.05 ± 2.46                                          | 0.73± 0.49                        | 618.73              | 0.69              | 0.53             |
| PVA 6.0 CS 0.25<br>-> | 7.58 ± 0.05                                           | 1.00 ± 0.01                       | 28.19               | 0.99              | 0.99             |
| PVA 6.0 CS 0.25<br><- | 8.73 ± 0.13                                           | 0.77 ± 0.02                       | 3.06                | 0.99              | 0.99             |
| PVA 6.0 CS 0.50<br>-> | 11.02 ± 0.39                                          | 0.91 ± 0.05                       | 4.29                | 0.99              | 0.99             |
| PVA 6.0 CS 0.50<br><- | 12.07 ± 0.46                                          | 0.79 ± 0.06                       | 20.64               | 0.97              | 0.97             |
| PVA 6.0 CS 0.75<br>-> | 14.44 ± 0.34                                          | 0.94 ± 0.03                       | 17.86               | 0.99              | 0.99             |
| PVA 6.0 CS 0.75<br><- | 16.92 ± 0.42                                          | 0.81 ± 0.03                       | 851.29              | 0.98              | 0.97             |
| PVA 6.0 CS 1.00<br>-> | 17.01 ± 0.36                                          | 1.08 ± 0.03                       | 7.71                | 0.99              | 0.99             |
| PVA 6.0 CS 1.00<br><- | 24.38 ± 2.21                                          | 0.70 ± 0.10                       | 14.79               | 0.98              | 0.98             |

|                        |               |             |         |      |      |
|------------------------|---------------|-------------|---------|------|------|
| <hr/>                  |               |             |         |      |      |
| <b>PVA 7.5 CS 0.25</b> |               |             |         |      |      |
| ->                     | 15.93 ± 0.44  | 1.07 ± 0.04 | 0.26    | 0.99 | 0.99 |
| <b>PVA 7.5 CS 0.25</b> |               |             |         |      |      |
| <-                     | 19.33 ± 2.82  | 0.87 ± 0.20 | 14.32   | 0.80 | 0.77 |
| <b>PVA 7.5 CS 0.50</b> |               |             |         |      |      |
| ->                     | 28.13 ± 1.51  | 0.84 ± 0.03 | 0.51    | 0.99 | 0.99 |
| <b>PVA 7.5 CS 0.50</b> |               |             |         |      |      |
| <-                     | 24.28 ± 1.52  | 0.90 ± 0.03 | 0.97    | 0.99 | 0.99 |
| <b>PVA 7.5 CS 0.75</b> |               |             |         |      |      |
| ->                     | 68.13 ± 4.79  | 0.78 ± 0.03 | 15.16   | 0.99 | 0.99 |
| <b>PVA 7.5 CS 0.75</b> |               |             |         |      |      |
| <-                     | 49.08 ± 6.75  | 0.91 ± 0.07 | 34.33   | 0.98 | 0.97 |
| <b>PVA 7.5 CS 1.00</b> |               |             |         |      |      |
| ->                     | 59.80 ± 2.21  | 0.80 ± 0.02 | 955.23  | 0.99 | 0.99 |
| <b>PVA 7.5 CS 1.00</b> |               |             |         |      |      |
| <-                     | 46.60 ± 5.00  | 0.91 ± 0.05 | 71.20   | 0.99 | 0.99 |
| <b>PVA 9.0 CS 0.25</b> |               |             |         |      |      |
| ->                     | 41.39 ± 1.72  | 0.86 ± 0.02 | 4.97    | 0.99 | 0.99 |
| <b>PVA 9.0 CS 0.25</b> |               |             |         |      |      |
| <-                     | 39.52 ± 2.74  | 0.87 ± 0.04 | 5.94    | 0.99 | 0.99 |
| <b>PVA 9.0 CS 0.50</b> |               |             |         |      |      |
| ->                     | 57.99 ± 3.41  | 0.84 ± 0.04 | 1.96    | 0.99 | 0.99 |
| <b>PVA 9.0 CS 0.50</b> |               |             |         |      |      |
| <-                     | 55.19 ± 9.98  | 0.86 ± 0.12 | 33.04   | 0.90 | 0.89 |
| <b>PVA 9.0 CS 0.75</b> |               |             |         |      |      |
| ->                     | 74.09 ± 1.86  | 0.83 ± 0.01 | 4.49    | 0.99 | 0.99 |
| <b>PVA 9.0 CS 0.75</b> |               |             |         |      |      |
| <-                     | 44.90 ± 1.65  | 1.06 ± 0.09 | 0.18    | 0.99 | 0.99 |
| <b>PVA 9.0 CS 1.00</b> |               |             |         |      |      |
| ->                     | 98.68 ± 4.04  | 0.80 ± 0.02 | 151.63  | 0.99 | 0.99 |
| <b>PVA 9.0 CS 1.00</b> |               |             |         |      |      |
| <-                     | 101.85 ± 5.44 | 0.78 ± 0.03 | 3601.34 | 0.99 | 0.99 |
| <hr/>                  |               |             |         |      |      |

**Table S3:** Qualitative analysis of fibers electrospinnability as described at the **Table 1**.

| PVA content<br>(% w/w) | Chitosan Content (% w/w) |      |      |      |
|------------------------|--------------------------|------|------|------|
|                        | 0.25                     | 0.50 | 0.75 | 1.00 |
| 4.5                    | ++                       | +++  | +    | ++   |
| 6.0                    | +                        | +++  | ++   | +++  |
| 7.5                    | +++                      | ++   | ++   | ++   |
| 9.0                    | +++                      | ++   | +    | +    |

\*+++; Good fiber mat formation; \*\*: medium fiber mat; poor fiber mat formation.

**Table S4:** pH of the sample solutions described at the **Table 1**.

| PVA content<br>(% w/w) | Chitosan content (% w/w) |           |       |           |      |           |       |           |
|------------------------|--------------------------|-----------|-------|-----------|------|-----------|-------|-----------|
|                        | 0.25                     |           | 0.50  |           | 0.75 |           | 1.00  |           |
|                        | Mean                     | Deviation | Mean  | Deviation | Mean | Deviation | Mean  | Deviation |
| 4.5                    | 1.113                    | 0.041     | 1.340 | 0.151     | 1.24 | 0.120     | 1.550 | 0.046     |
| 6.0                    | 1.290                    | 0.030     | 1.486 | 0.040     | 1.44 | 0.052     | 1.570 | 0.052     |
| 7.5                    | 1.483                    | 0.035     | 1.546 | 0.006     | 1.63 | 0.040     | 1.527 | 0.040     |
| 9.0                    | 1.406                    | 0.105     | 1.433 | 0.042     | 1.52 | 0.067     | 1.573 | 0.067     |

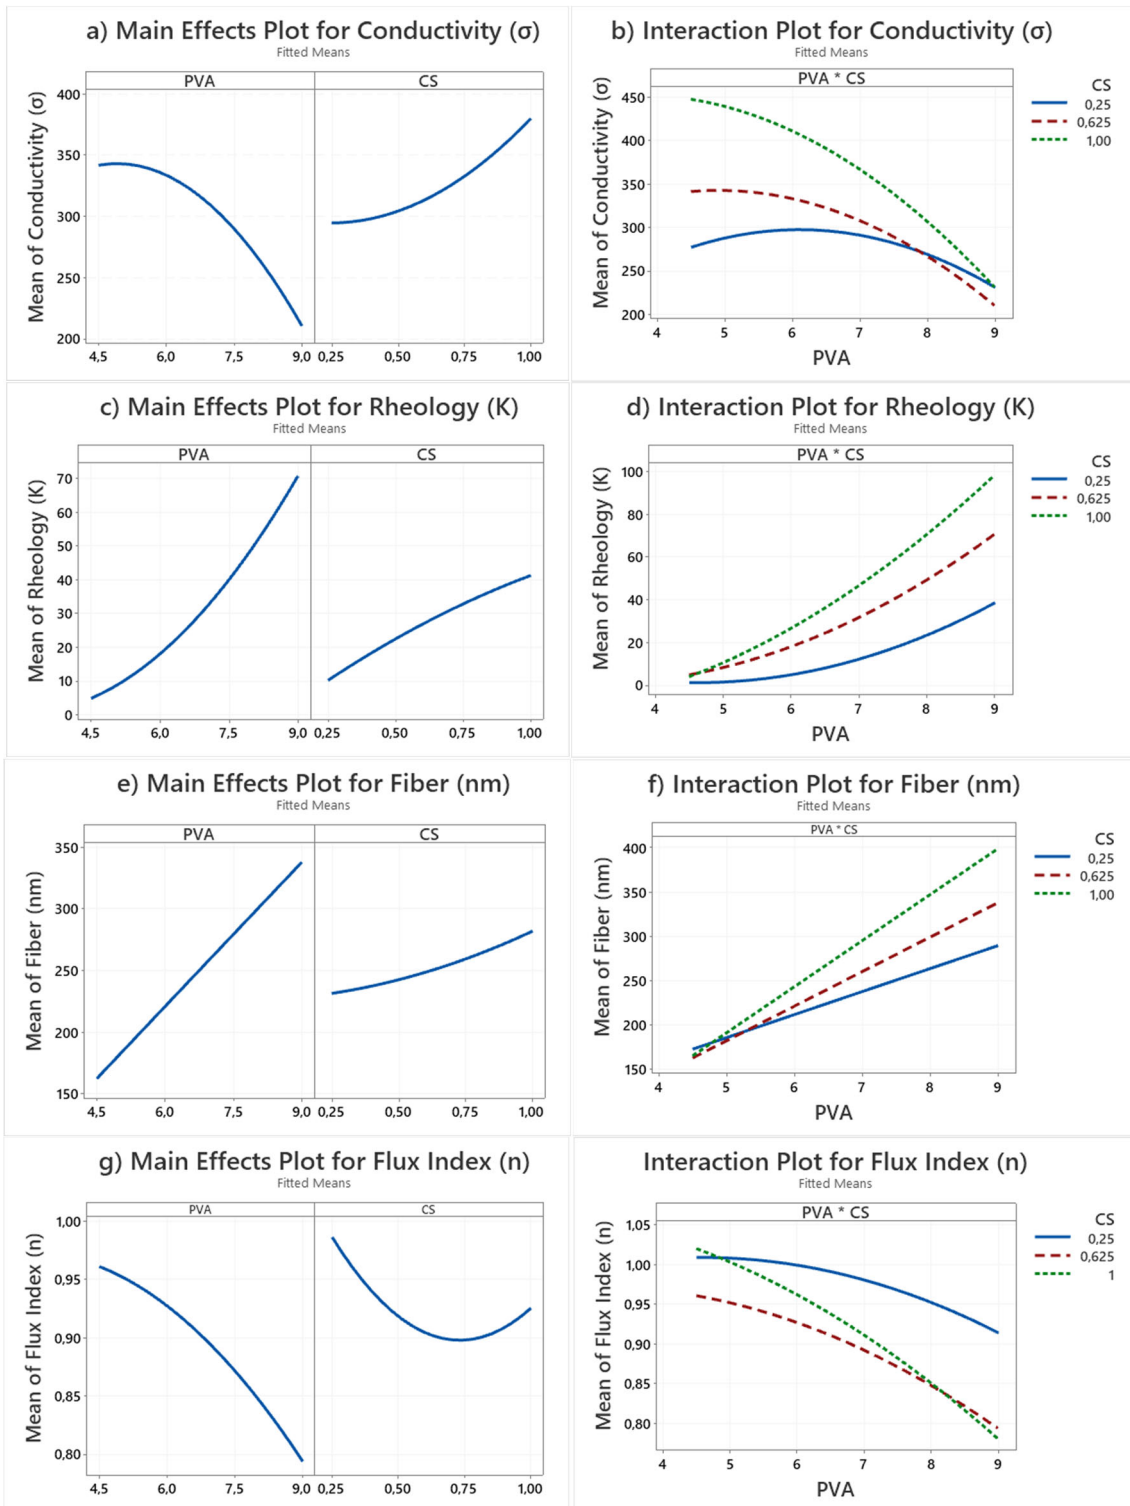

**Figure S1** Main Effects and the resulting Interaction Plot for each variable, respectively, being: (a) and (b) Electrical Conductivity; (c) and (d) Rheology Consistency Index; (e) and (f) Fiber Diameter; and (g) and (h) Flow Index.
